# Supplementary material for: Establishment and genomic characterization of the new chordoma cell line Chor-IN-1
Source: PubMed Central journal article supplement (PMC5569021; doi:10.1038/s41598-017-10044-3), 2017-08-23
Supplement: 41598_2017_10044_MOESM1_ESM.pdf [file 41598_2017_10044_MOESM1_ESM.pdf]

## Supplementary Information

# Establishment and genomic characterization of the new chordoma cell line Chor-IN-1

---

Roberta Bosotti<sup>1§\*</sup>, Paola Magnaghi<sup>1§</sup>, Sebastiano Di Bella<sup>1</sup>, Liviana Cozzi<sup>1</sup>, Carlo Cusi<sup>1</sup>, Fabio Bozzi<sup>2</sup>, Nicola Beltrami<sup>3</sup>, Giovanni Carapezza<sup>1</sup>, Dario Ballinari<sup>1</sup>, Nadia Amboldi<sup>1</sup>, Rosita Lupi<sup>1</sup>, Alessio Somaschini<sup>1</sup>, Laura Radrizzani<sup>1</sup>, Barbara Salom<sup>1</sup>, Arturo Galvani<sup>1</sup>, Silvia Stacchiotti<sup>2</sup>, Elena Tamborini<sup>2</sup> & Antonella Isacchi<sup>1</sup>

<sup>1</sup> Oncology, Nerviano Medical Sciences, Nerviano (MI), Italy

<sup>2</sup> Fondazione IRCCS Istituto Nazionale dei Tumori, Milan, Italy

<sup>3</sup> L.C. Laboratori Campisi, Avola (SR), Italy

§ These authors equally contributed to the work

\*corresponding author:

Roberta Bosotti

Oncology

Nerviano Medical Sciences

Viale Pasteur 10

20014 Nerviano (MI)

Email: roberta.bosotti@nervianoms.com

Phone: +39-0331581286

## Supplementary Figures:

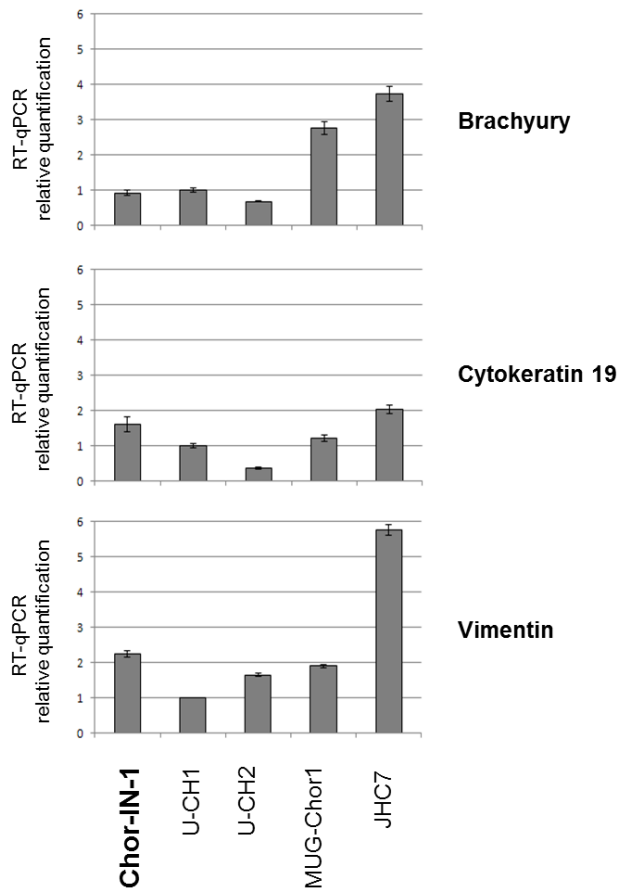

**Supplementary Figure 1: RT-qPCR analysis of brachyury, cytokeratin 19 and vimentin gene expression in Chor-IN-1 and in a panel of chordoma cell lines.**

Histogram bars represent RT-qPCR relative quantification results, carried out as described in M&M and normalized using U-CH1 as a reference sample.

|                                                   | AMEL | CSF1PO | D13S317 | D16S539 | D18S51 | D21S11 | D3S1358 | D5S818 | D7S820 | D8S1179 | FGA | TH01 | TPOX | VWA | PentaD | PentaE |    |    |    |    |    |      |     |     |    |    |    |    |    |    |    |    |
|---------------------------------------------------|------|--------|---------|---------|--------|--------|---------|--------|--------|---------|-----|------|------|-----|--------|--------|----|----|----|----|----|------|-----|-----|----|----|----|----|----|----|----|----|
| <b>Chor-IN-1 cell line (established in house)</b> | X    | Y      | 10      | 12      | 11     | 12     | 13      | 13     | 15     | 17      | 31  | 31.2 | 17   | 18  | 9      | 12     | 8  | 9  | 12 | 15 | 21 | 22   | 9.3 | 9.3 | 7  | 8  | 18 | 18 | 13 | 13 | 12 | 21 |
| <b>Chor-IN-1 original tumor</b>                   | X    | Y      | 10      | 12      | 11     | 12     | 13      | 13     | 15     | 17      | 31  | 31.2 | 17   | 18  | 9      | 12     | 8  | 9  | 12 | 15 | 21 | 22   | 9.3 | 9.3 | 7  | 8  | 18 | 18 | 13 | 13 | 12 | 21 |
| <b>U-CH1 cell line (Chordoma Foundation)</b>      | X    | Y      | 10      | 11      | 11     | 13     | 12      | 13     | 15     | 15      | 28  | 29   | 15   | 15  | 11     | 12     | 9  | 12 | 10 | 15 | 20 | 21   | 7   | 7   | 8  | 11 | 17 | 17 | 11 | 11 | 7  | 10 |
| <b>reference profile (DSMZ_DB)</b>                | X    | Y      | 10      | 11      | 11     | 13     | 12      | 13     |        |         |     |      |      |     |        |        | 11 | 12 | 9  | 12 |    |      | 7   | 7   | 8  | 11 | 17 | 17 |    |    |    |    |
| <b>U-CH2 cell line (Chordoma Foundation)</b>      | X    | X      | 11      | 12      | 11     | 11     | 12      | 12     | 12     | 18      | 29  | 30   | 17   | 17  | 10     | 11     | 8  | 12 | 13 | 13 | 21 | 22.2 | 6   | 6   | 8  | 8  | 17 | 17 | 12 | 13 | 12 | 15 |
| <b>reference profile (COSMIC_DB)</b>              | X    | X      | 11      | 12      | 11     | 11     | 12      | 12     |        |         |     |      |      |     | 10     | 11     | 8  | 12 |    |    |    |      | 6   | 6   | 8  | 8  | 17 | 17 |    |    |    |    |
| <b>MUG-Chor1 cell line (ATCC)</b>                 | X    | X      | 11      | 11      | 11     | 11     | 11      | 14     | 17     | 23      | 29  | 33.2 | 14   | 17  | 11     | 12     | 8  | 11 | 11 | 12 | 21 | 26   | 9.3 | 9.3 | 8  | 8  | 15 | 15 | 13 | 13 | 5  | 12 |
| <b>reference profile (DSMZ_DB)</b>                | X    | X      | 11      | 11      | 11     | 11     | 11      | 14     |        |         |     |      |      |     | 11     | 12     | 8  | 11 |    |    |    |      | 9.3 | 9.3 | 8  | 8  | 15 | 15 |    |    |    |    |
| <b>JHC7 cell line (Chordoma Foundation)</b>       | X    | X      | 11      | 11      | 11     | 11     | 11      | 11     | 12     | 12      | 27  | 31.2 | 17   | 17  | 13     | 13     | 7  | 10 | 13 | 14 | 21 | 23   | 6   | 8   | 10 | 11 | 17 | 17 | 6  | 11 | 15 | 15 |
| <b>reference profile (ATCC_DB)</b>                | X    | X      | 11      | 11      | 11     | 11     | 11      |        |        |         |     |      |      |     | 13     | 13     | 7  | 10 |    |    |    |      | 6   | 8   | 10 | 11 | 17 | 17 |    |    |    |    |

### Supplementary Figure 2: Characterization of chordoma cell lines by STR profiling

Chordoma cell line STR profiles are compared against the corresponding public reference STR profile (dark grey). The profile obtained for the newly established Chor-IN-1 cell line and Chor-IN-1 original tumor is highlighted in light grey.

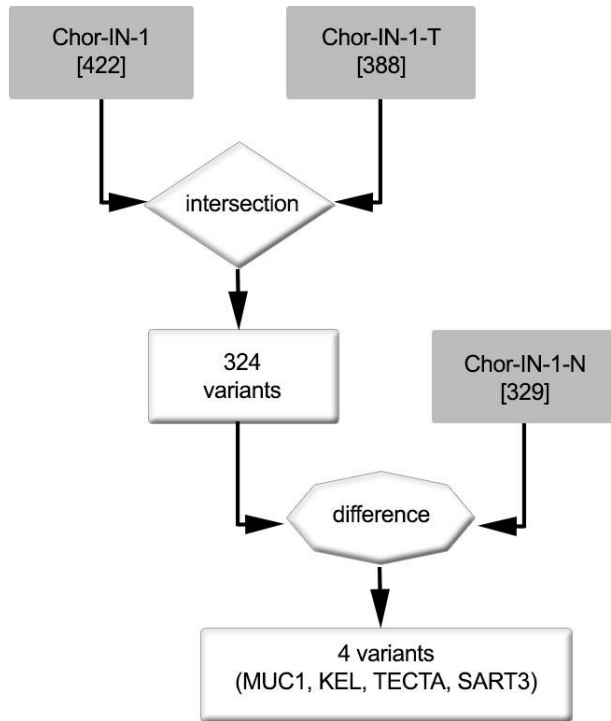

| Chr   | Start     | End       | Ref | Alt | Gene  | Func.refGene | ExonicFunc.refGene  | AAChange |
|-------|-----------|-----------|-----|-----|-------|--------------|---------------------|----------|
| chr1  | 155162090 | 155162090 | G   | T   | MUC1  | exonic       | nonsynonymous SNV   | p.P24T   |
| chr7  | 142638362 | 142638362 | A   | -   | KEL   | exonic       | frameshift deletion | p.S726fs |
| chr11 | 121028593 | 121028593 | G   | A   | TECTA | exonic       | nonsynonymous SNV   | p.R1450H |
| chr12 | 108926001 | 108926001 | C   | T   | SART3 | exonic       | nonsynonymous SNV   | p.E556K  |

### Supplementary Figure 3: Flowchart of the identification of somatic variants in Chor-IN-1

Flowchart summarizing the procedure followed for the identification of somatic gene variants in Chor-IN-1. The intersection of variants identified in the Chor-IN-1 cell line and in the corresponding tumor sample yielded 324 common variants (~80%). Germline variants were then subtracted, resulting in the identification of 4 gene variants, as detailed in the lower panel. Chor-IN-1-T and Chor-IN-1-N indicate tumor and normal tissue samples, respectively.

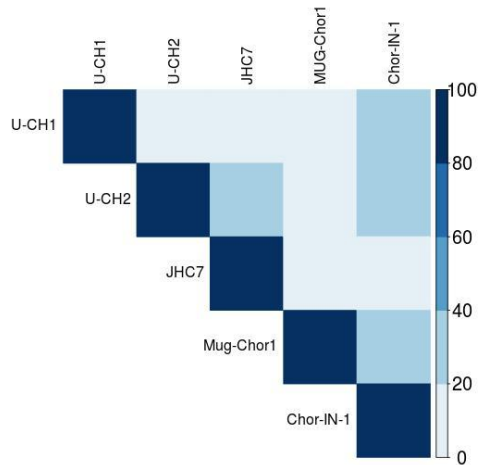

**Supplementary Figure 4: Comparison of the number of variants identified in chordoma cell lines**

Intersection of the gene variants identified in different chordoma cell lines. Light to dark blue shades in squares represent the percent number of variants in common between each cell line and all the others.

a)

```

<I>M S S P G T E S A G K S L Q Y R V D H L L S A V E N E L G A G S E K
1 ATGAGCTGCC CTGGACCGA GAGCGGGGGA AAGAGCCTCC AGTACCGAGT GGACCACTG CTSAGCGCGG TGGAGATGA GCTCGAGGGG GGCAGGGGGA
  TACTCGAAGG GACCGTGGCT CTCGCGCCCT TTCTCGAGC TCATGGCTCA CTTGGGTGAC GACTCGCGCG ACCTCTTACT CGACGTCGCG CCGTCCGCTCT
<I>K G D P T E R E L R V G L E E S E L V L R F K E L T N E M I V T K N
101 AGGGCGACCC CACAGAGCGC GAACGCGCGC TGGCGCTGGA GGAGAGCGAG CTGTGGCTCC GCTTCAAGGA GCTCACCAAT GAGATGATCG TGACCAAGAA
  TCCCGCTGGG GTGTCTCGCG CTTGAGCGCGC ACCCGGACCT CCTCTCGCTC GCACAGCGAG CGAAGTCTCT CGAGTGGTTA CTCCTACTAGC ACTGGTCTCT
<I>N G R R R M F P Y L K X Y N V S G L D F N A M Y S F L L D F V Y A A D N H
201 CGGAGAGAGG ATGTTTCGGG TGCTGAAGGT GAACTGTGCT GGCTGGAGCC CCAGGCCAT GTACTGCTTC CTGCTGACT TGTGGCGCG GGCAGACCCAC
  GCCTCTCC TACAGAGGCG ACGACTTCCA CTTGACAGAG CCGGACTCGG GGTTCGGTGA CATGAGGAGG GAGCACTGGA AGCAACCGCG CCTGTGTGTG
<I>R V K Y Y N G E V Y F G G K P E P Q A P S C V Y I H P D S P N F D A
301 CGCTGAGAGT ACGTAAACGG GAAATGGGTT CCGGGGGGCA AGCGGAGCCG CGAGCGCGCC AGCTGGCTCT ACATCCACC CGACTCGCGC AACTTCGGGG
  CGGACCTTCA TGACCTTCCG CCTTACCACG GGCCCCCGCT TGGCGCTCGG COTCCGCGGG TCGACCCAGA TGTAGGTGGG GCTGAGCGGG TTAGAAGCCG
<I>A H V M K A P V S F S K Y K L T N K L N G G G Q I M L N S L H K Y E
401 CCCACTGGAT GAAGGCTCCG GTCTCTTCA GCAAAGTCAA GCTCACCAAC AAGCTCAAG GAGGGGGCCA GATCATGCTG AACCTCTTCC ATAAATATGA
  GGGTAGCTA CTTCGAGGG CAGAGAGAT GGTTCAGTT CGAGTGGTTG TTGAGTGTCC CTCGCCCGGT CTAGTAGGAC TTGAGGAGCG TATTCTACT
<I>E P R I R V R Y S G S G R M I T S H C F P E T G F I A V T A Y V Q N
501 GCTCGAATC CACATAGTGA GAGTTGGGG TCCAGAGCGG ATGATCACA GGCCTGCTT CCTGAGACC CAGTTCATAG GGGTACTG TTATAGAAC
  CGAGCTTAG GTGTATACT CTCAGCCG CCGTGTGCG TACTATGTT CGGTGACGAA GGGACTCTGG GTCAGTATC GGCACGAGG AATAGCTTGG
<I>E E I T A L K I X Y N P F A K A F L D A K E R S D H K E M M E E P G
601 GAGGAGTCA CAGCTTAA AATTAAGTAC AATCCATTTG CAAAAGCTTT CCTTGATCA AAGGALAGA GTGATCACA AGAGATGATG GAGGACCGG
  CTCTCTAGT GTGAGAAAT TTAATTCATG TTAGGTAAAC GTTTTCGAAA GAACTACTGT TTCTTCTCT CACTAGTGT TTCTACTAC CTCCTTGGCG
<I>G D S Q Q P G Y S Y S Q S Y S D N S P A C L S M L G S H D N V S S L G M
701 GAGACAGCA GCAACTCGGG TACTCCCAAT OCTATTCTGA CAACTCACT GCATTTTAT CCATGCTGCA ATCCCATGAC AATTGGTCCA GCCTTGGAA
  CTCTCTGGT CATTGGACC ATGAGGTTA GGATAAGACT GTTGAATGGA COTACAAATA GGTACGACCT TAGGGTACTG TTAACCGAGT CGGAACTTAA
<I>M P A H P S M L P Y S P N A P P T S E V F S V S N D A V
801 GCTGCGCAT CCGAGATCC TCCCGGTAG CCACAAATCC AGCCCACTA CCAGCTCCAG TCAGTACCC AGCCTGGT CTGTGACAA CGGCGCGTC
  CGAGCGGTA GGTGTACG AAGGGCACT GGTGTACGG TCGGTGATG GGTGAGGTC AGTCAATGGG TGGACACCA GACTCTGT GCGCGCGAG
<I>T P G S G A A A Y S N G L G A Q F F R G S P A H Y T P L T H P Y S A
901 ACCCGGGCT CCGAGCAGC AGCCTGTCC AACGGGCTGG GCGGCCAGTT CTTCGGGGC TCCCGCGCG ACTACACCC CCTCACCAT CCGGTCTGG
  TGGGGCCGA GGTCTCGTGG TCGGACAGG TTGCGCGACC CCGGGTCAA GAAGGCGCG AGGGGGCGCG TGATGTGG GAGTGGGTA GCGCAGAGCC
<I>A P S S S G S P L Y E G A A A A T D I Y D S Q Y D A A A Q G R L I A
1001 GCGCCCTTTC CTGCGGATCC CCACTGTAGC AAGGGGGCGG CCGGGCCACA GACATCTGG ACAGCCAGTA CGACCGCGCA GCCCAAGGCC GCCTCATGC
  GCGGAGAGG GAGCCCTAGG GGTGACATCC TTCCCGCGCG GCGCGGGTGT CTGTAGCACC TGTGGTCTAT GCTCGCGCGT CCGGTTCGCG GCGAGTATCG
<I>A S V T F S P S M
1101 CTCATGACA CTTGTGCG CACTTCAAT GTGA
  GAGTACCTGT GGACACAGCG GTGGAAGTGA CACT

```

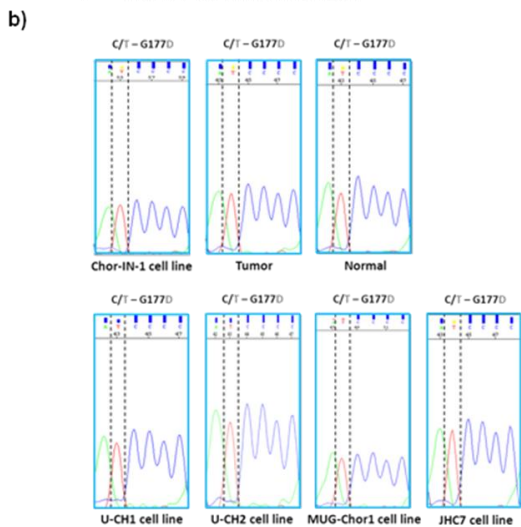

**Supplementary Figure 5: Brachyury p.G177D polymorphism**

a) The DNA sequence and the corresponding protein translation of brachyury (T) is reported. The position of c.530G>A (p.G177D) polymorphism is boxed. b) Sanger sequencing electropherograms show the c.530 nucleotide position in the following samples: Chor-IN-1 cell line, original tumor, adjacent normal sample (upper panel); U-CH1 cell line, U-CH2 cell line, MUG-Chor1-1 cell line and JHC7 cell line (lower panel).

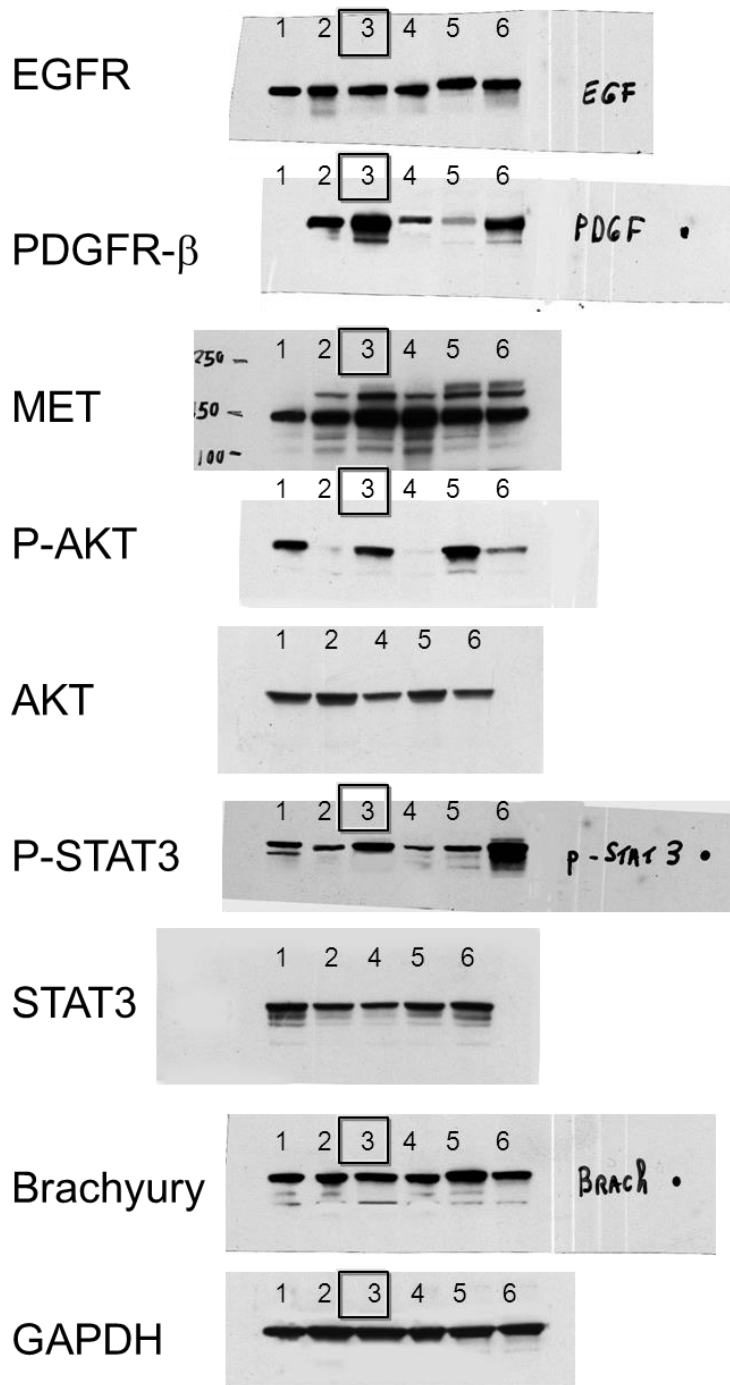

**Supplementary Figure 6: Full-length blots reporting the molecular characterization of Chor-IN-1 cell line**

The original blots included also an additional lane (number 3) reporting the U-CH2 cell line obtained from a different provider (ATCC). This lane was removed from Fig.2 because this cell line did not undergo genomics characterization.

## Supplementary Tables

**Supplementary Table 1: Kinase gene expression in chordoma cell lines. Values are reported as  $\log_2$ (normalized counts).**

| Kinase   | Chor-IN-1 | JHC7  | Mug-Chor-1 | U-CH1 | U-CH2 |
|----------|-----------|-------|------------|-------|-------|
| ABL1     | 12.82     | 11.26 | 12.84      | 12.67 | 11.89 |
| ABL2     | 12.18     | 12.03 | 11.34      | 12.69 | 12.31 |
| ACVR1    | 10.23     | 11.52 | 11.42      | 11.76 | 12    |
| ADCK2    | 11.21     | 10.66 | 11.58      | 11.22 | 11.68 |
| ADCK3    | 10.28     | 10.18 | 9.67       | 11.3  | 9.45  |
| ADCK4    | 10.12     | 10.49 | 11.77      | 10.45 | 9.38  |
| ADRBK1   | 11.85     | 12.49 | 12.01      | 11.11 | 11.85 |
| AKT1     | 13.64     | 12.4  | 12.78      | 13.34 | 13.39 |
| AKT2     | 12.43     | 12.98 | 13.01      | 12.36 | 13.77 |
| AKT3     | 12.72     | 13.43 | 13.16      | 10.11 | 12.94 |
| ALPK2    | 12.78     | 12.33 | 12.25      | 12.37 | 12.61 |
| ARAF     | 13.55     | 13.27 | 12.91      | 13.44 | 13.31 |
| ATM      | 10.87     | 11.53 | 11.31      | 10.45 | 10.63 |
| ATR      | 10.49     | 9.97  | 11.3       | 11.07 | 10.91 |
| AURKA    | 12.8      | 12.89 | 12.13      | 13.19 | 12.15 |
| AURKB    | 11.41     | 10.2  | 9.56       | 11.12 | 9.57  |
| AXL      | 15.59     | 9.5   | 13.88      | 13.5  | 15.93 |
| BCKDK    | 12.84     | 13.04 | 12.78      | 12.78 | 12.88 |
| BMP2K    | 11.22     | 12.56 | 11.02      | 11.03 | 11.69 |
| BMPR2    | 12.37     | 12.85 | 12.46      | 12.67 | 12.48 |
| BRD4     | 13.06     | 13.59 | 13.32      | 12.81 | 13.34 |
| BUB1B    | 11.58     | 10.96 | 11.94      | 11.67 | 11.4  |
| CAMK1    | 11.5      | 11.24 | 11.24      | 10.55 | 9.86  |
| CAMK2D   | 12.28     | 13.19 | 12.5       | 12.46 | 13.14 |
| CAMKK2   | 11.52     | 10.52 | 11.02      | 10.78 | 10.94 |
| CDC42BPA | 12.65     | 12.43 | 12.19      | 12.66 | 12.44 |



|          |       |       |       |       |       |
|----------|-------|-------|-------|-------|-------|
| CDC42BPB | 13.56 | 12.61 | 11.99 | 13    | 13.1  |
| CDK11A   | 9.59  | 11.67 | 11.59 | 10.63 | 10.27 |
| CDK11B   | 11.47 | 12.77 | 11.94 | 11.94 | 11.45 |
| CDK12    | 11.83 | 11.93 | 12.13 | 12.33 | 11.45 |
| CDK13    | 11.46 | 10.56 | 11.41 | 11.43 | 11.5  |
| CDK14    | 11.59 | 9.19  | 10.73 | 9.26  | 10.51 |
| CDK16    | 12.82 | 14.01 | 13.24 | 13.23 | 13.17 |
| CDK17    | 11.84 | 10.65 | 11.01 | 11.57 | 11.48 |
| CDK18    | 11.66 | 13.02 | 12.73 | 11.06 | 11.61 |
| CDK19    | 11.42 | 11.18 | 9.81  | 11.11 | 9.97  |
| CDK2     | 11.99 | 10.54 | 11.36 | 11.78 | 11.09 |
| CDK4     | 13.21 | 12.42 | 13.61 | 13.64 | 13.77 |
| CDK5     | 12.36 | 11.56 | 12.13 | 11.55 | 12.76 |
| CDK6     | 13.22 | 11.57 | 11.78 | 13.09 | 13.15 |
| CDK7     | 14.24 | 12.88 | 13.83 | 13.93 | 13.65 |
| CDK9     | 11.97 | 11.23 | 12.36 | 12.71 | 10.83 |
| CHEK2    | 9.96  | 10.2  | 10.24 | 10.23 | 10.7  |
| CHUK     | 11.6  | 10.37 | 10.41 | 11.3  | 11.25 |
| CLK1     | 10.06 | 11.77 | 11.85 | 11.06 | 10.4  |
| CLK2     | 10.5  | 10.93 | 11    | 11.31 | 10.3  |
| CLK3     | 10.07 | 9.43  | 10.34 | 9.82  | 10.26 |
| CSK      | 11.68 | 9.93  | 11.65 | 10.28 | 12.07 |
| CSNK1A1  | 13.09 | 13.08 | 13.14 | 13.11 | 12.89 |
| CSNK1D   | 12.31 | 12.63 | 12.26 | 12.62 | 12.59 |
| CSNK1E   | 12.72 | 12.73 | 11.79 | 13.01 | 12.89 |
| CSNK1G2  | 10.89 | 10.83 | 11.22 | 10.62 | 11.2  |
| CSNK1G3  | 11.42 | 11.86 | 10.82 | 11.48 | 11.19 |
| CSNK2A1  | 12.57 | 12.94 | 12.42 | 12.71 | 11.9  |
| CSNK2A2  | 11.17 | 10.83 | 11.19 | 10.41 | 11.84 |
| DAPK3    | 10.24 | 11.38 | 10.68 | 11.49 | 11.14 |
| DCLK2    | 10.05 | 10.24 | 11.39 | 10.95 | 10.95 |
| DDR1     | 13.58 | 12.48 | 12.62 | 13.37 | 13.05 |
| DDR2     | 12.51 | 12.7  | 13.53 | 11.5  | 13.12 |
| DYRK1A   | 11.81 | 11.45 | 11.98 | 11.9  | 11.62 |
| DYRK1B   | 10.46 | 8.11  | 10.88 | 9.97  | 11.43 |
| DYRK4    | 12.14 | 12.21 | 10.93 | 11.49 | 12.61 |
| EGFR     | 11.37 | 11.59 | 11.29 | 12.66 | 11.36 |
| EIF2AK1  | 14.15 | 13.95 | 14.06 | 14.62 | 14.45 |
| EIF2AK2  | 12.27 | 12.98 | 12.48 | 12.54 | 12.13 |
| EIF2AK4  | 12.36 | 12.03 | 12.49 | 12.64 | 13.05 |
| EPHA4    | 9.09  | 11.33 | 9.94  | 11.55 | 8.53  |

|         |       |       |       |       |       |
|---------|-------|-------|-------|-------|-------|
| EPHB4   | 11.58 | 10.8  | 10.97 | 11.72 | 11.57 |
| FASTK   | 12.09 | 11.98 | 12.11 | 12.07 | 12.59 |
| FER     | 11.7  | 9.83  | 10.38 | 10.75 | 10.19 |
| FGFR1   | 13.44 | 8.2   | 13.32 | 11.25 | 12.49 |
| FLT1    | 8.7   | 12.92 | 13    | 11.56 | 9.69  |
| GAK     | 11    | 10.37 | 11.62 | 11.22 | 10.96 |
| GRK6    | 11.62 | 12.68 | 11.9  | 8.92  | 11.78 |
| GSK3A   | 12.21 | 12.58 | 12.94 | 12.16 | 13.24 |
| GSK3B   | 10.86 | 10.78 | 10.95 | 11.32 | 11.33 |
| HIPK1   | 11.51 | 11.97 | 12.29 | 12.7  | 11.86 |
| HIPK2   | 10.06 | 11.54 | 9.85  | 10.33 | 11.64 |
| HIPK3   | 12.89 | 13.62 | 12.75 | 11.06 | 12.4  |
| HUNK    | 10.85 | 12.36 | 13.28 | 13.47 | 10.31 |
| IGF1R   | 11.11 | 10.3  | 10.62 | 7.59  | 11.28 |
| IKBKAP  | 11.86 | 11.03 | 11.6  | 11.74 | 10.38 |
| IRAK1   | 12.68 | 12.22 | 12.55 | 12.59 | 13.24 |
| IRAK4   | 10.83 | 9.85  | 11.39 | 11.23 | 11.06 |
| ITK     | 10.33 | 10.64 | 10.42 | 11.28 | 9.2   |
| JAK1    | 10.65 | 13.07 | 12.02 | 11.72 | 11.16 |
| JAK2    | 10.24 | 9.91  | 9.68  | 11.28 | 9.47  |
| LATS2   | 11.88 | 11.77 | 12.39 | 11.91 | 13.12 |
| LIMK1   | 10.75 | 10.37 | 10.92 | 11.43 | 12.91 |
| LIMK2   | 10.82 | 9.41  | 10    | 9.35  | 12.05 |
| LYN     | 10.54 | 10.3  | 11.1  | 10.94 | 10.52 |
| MAP2K1  | 12.78 | 11.87 | 12    | 12.8  | 12.53 |
| MAP2K2  | 13.45 | 13.76 | 13.29 | 13.21 | 13.87 |
| MAP2K3  | 11.52 | 12.41 | 11.64 | 12.35 | 11.12 |
| MAP2K5  | 10.85 | 9.96  | 10.47 | 10.5  | 11.22 |
| MAP3K10 | 9.75  | 10.63 | 10.42 | 10.68 | 11.41 |
| MAP3K2  | 12.89 | 12.42 | 12.1  | 12.48 | 12.68 |
| MAP3K3  | 12.95 | 11.96 | 11.6  | 11.01 | 12.06 |
| MAP3K4  | 11.17 | 13.08 | 9.97  | 9.69  | 11.75 |
| MAP3K6  | 9.9   | 10.87 | 10.61 | 10.17 | 10.14 |
| MAP3K7  | 11.94 | 12.28 | 10.9  | 11.83 | 11.03 |
| MAP4K2  | 9.91  | 11.22 | 10.96 | 10.3  | 10.04 |
| MAP4K4  | 11.5  | 11.95 | 10.9  | 12.05 | 12.3  |
| MAP4K5  | 11.69 | 12.06 | 11.17 | 11.76 | 12.45 |
| MAPK1   | 12.08 | 13.13 | 11.53 | 11.72 | 12.42 |
| MAPK11  | 9.87  | 9.18  | 10.32 | 10.63 | 10.72 |
| MAPK12  | 10.5  | 11.45 | 11.2  | 10.92 | 11.6  |
| MAPK14  | 12.45 | 12.63 | 12.24 | 12.67 | 11.6  |

|          |       |       |       |       |       |
|----------|-------|-------|-------|-------|-------|
| MAPK3    | 12.33 | 11.47 | 12.21 | 11.74 | 12.83 |
| MAPK6    | 12.31 | 12.04 | 12.12 | 12.84 | 12.88 |
| MAPK7    | 10.77 | 10.91 | 11.09 | 11.96 | 10.31 |
| MAPK9    | 11.96 | 12.43 | 11.35 | 11.9  | 11.69 |
| MAPKAPK2 | 13.11 | 13.44 | 12.5  | 12.1  | 13.29 |
| MARK3    | 12.49 | 11.91 | 11.58 | 12.77 | 12.71 |
| MAST3    | 9.64  | 11.16 | 10.84 | 10.17 | 10.9  |
| MELK     | 10.86 | 10.45 | 10.53 | 10.91 | 10.88 |
| MET      | 15.1  | 12.91 | 13.09 | 14.07 | 14.41 |
| MINK1    | 12.7  | 10.81 | 10.62 | 12.3  | 10.93 |
| MKNK1    | 10.63 | 11.34 | 10.35 | 10.79 | 9.28  |
| MKNK2    | 13.2  | 14.4  | 12.6  | 12.1  | 13.45 |
| MLKL     | 12.21 | 10.74 | 10.45 | 11.53 | 10.98 |
| MST4     | 11.3  | 11.29 | 10.85 | 10.07 | 10.83 |
| MTOR     | 10.84 | 12.32 | 11.04 | 11.15 | 10.83 |
| NEK2     | 11.95 | 12.21 | 11.45 | 11.59 | 11.38 |
| NEK6     | 10.49 | 10.41 | 11.01 | 11.07 | 11.31 |
| NEK7     | 15.36 | 13.57 | 12.89 | 13.75 | 16.71 |
| NEK9     | 12.17 | 8.34  | 11.61 | 10.84 | 11.85 |
| NLK      | 10.88 | 12.22 | 10.17 | 11.04 | 11.48 |
| NPR2     | 11.1  | 9.16  | 10.21 | 10.46 | 10.33 |
| NRBP1    | 12.41 | 12.49 | 12.4  | 12.31 | 12.24 |
| NRBP2    | 10.75 | 11.08 | 11.17 | 10.1  | 10.36 |
| NUAK1    | 11.57 | 9.2   | 11.19 | 10.04 | 9.95  |
| OXR1     | 13.55 | 11.72 | 13.09 | 12.59 | 11.66 |
| PAK2     | 12.08 | 12.16 | 12.42 | 12.5  | 12.74 |
| PAK4     | 11.81 | 11.45 | 11.86 | 11.78 | 12.54 |
| PBK      | 13.43 | 11.45 | 12.78 | 12.22 | 10.98 |
| PDK1     | 8.95  | 10.7  | 9.45  | 11.07 | 8.79  |
| PDK3     | 8.94  | 11.72 | 10.72 | 12.23 | 8.76  |
| PDPK1    | 11.97 | 10.92 | 11.6  | 10.98 | 10.95 |
| PEAK1    | 11.16 | 9.33  | 11.55 | 10.81 | 11.59 |
| PHKG2    | 11.01 | 11.31 | 11.28 | 11.66 | 10.54 |
| PIK3R4   | 9.99  | 9.92  | 10.94 | 10.19 | 10.61 |
| PIM1     | 9.21  | 10.79 | 10.12 | 10.66 | 9.58  |
| PIM2     | 11.05 | 11.72 | 11.04 | 12.37 | 10.91 |
| PIM3     | 10.58 | 11.38 | 11.97 | 11.73 | 12.77 |
| PINK1    | 11.54 | 14.12 | 11.3  | 12.21 | 12.99 |
| PKN1     | 12.44 | 13.23 | 12.24 | 11.45 | 12.95 |
| PKN2     | 11.15 | 10.9  | 11.95 | 10.87 | 10.5  |
| PLK1     | 13.67 | 12.43 | 12.43 | 12.81 | 11.73 |

|         |       |       |       |       |       |
|---------|-------|-------|-------|-------|-------|
| PLK2    | 15.36 | 11.35 | 14.55 | 16.04 | 11.69 |
| PRKAA1  | 11.41 | 11.28 | 11.79 | 11.37 | 11.45 |
| PRKACA  | 13.26 | 12.48 | 12.69 | 12.61 | 13.04 |
| PRKACB  | 10.6  | 10.52 | 10.29 | 10.78 | 10.45 |
| PRKAG1  | 13.61 | 12.79 | 13.31 | 12.83 | 13.45 |
| PRKCD   | 11.28 | 9.78  | 12.27 | 10.41 | 10.23 |
| PRKCI   | 10.65 | 10.84 | 10.48 | 10.82 | 10.8  |
| PRKCZ   | 11.05 | 13    | 12.47 | 8.96  | 11.7  |
| PRKD3   | 11.56 | 11.29 | 11.53 | 11.71 | 11.37 |
| PTK2    | 12.85 | 12.66 | 12.31 | 11.78 | 12.03 |
| PTK2B   | 11.91 | 9.33  | 11.34 | 9.52  | 10.31 |
| PXK     | 10.24 | 9.58  | 11.31 | 10.38 | 10.77 |
| RAF1    | 12.51 | 13.15 | 13.08 | 12.4  | 11.65 |
| RIOK1   | 11.17 | 11.73 | 10.2  | 11.35 | 10.18 |
| RIOK2   | 11.36 | 11.84 | 11.54 | 11.56 | 11.87 |
| RIOK3   | 12.55 | 12.1  | 12.66 | 12.72 | 11.63 |
| RIPK2   | 11.58 | 12.33 | 10.76 | 12.25 | 11.8  |
| ROCK1   | 12.01 | 11.98 | 12.02 | 11.25 | 12.05 |
| ROCK2   | 12.12 | 12.03 | 12.08 | 11.36 | 11.8  |
| RPS6KA1 | 9.77  | 11.83 | 11.15 | 10.63 | 11.01 |
| RPS6KA3 | 11.38 | 11.63 | 12.19 | 12.02 | 12.52 |
| RPS6KB1 | 10.57 | 10.95 | 10.98 | 10.94 | 10.49 |
| RPS6KB2 | 10.99 | 11.52 | 11.14 | 10.57 | 11.28 |
| RPS6KC1 | 9.5   | 10.58 | 9.9   | 11.51 | 9.9   |
| RYK     | 11.42 | 11.68 | 12.35 | 11.84 | 12.62 |
| SCYL1   | 12.43 | 12.88 | 12.94 | 12.15 | 12.91 |
| SCYL2   | 11.85 | 10.92 | 11.35 | 12.19 | 11.69 |
| SGK1    | 13.86 | 12.85 | 11.38 | 13.59 | 14.41 |
| SGK223  | 12.48 | 11.4  | 12.03 | 9.64  | 11.71 |
| SIK3    | 12.23 | 12.14 | 12.55 | 10.37 | 11.86 |
| SLK     | 12.55 | 10.74 | 11.61 | 11.51 | 11.47 |
| SMG1    | 10.97 | 10.93 | 10.83 | 10.72 | 10.14 |
| SRC     | 10.18 | 11.22 | 10.58 | 11.44 | 10.64 |
| SRPK1   | 12.25 | 12.56 | 11.27 | 12.24 | 10.63 |
| SRPK2   | 10.5  | 11.17 | 10.9  | 10.21 | 10.77 |
| STK10   | 13.06 | 12.3  | 11.76 | 11.67 | 11.36 |
| STK16   | 10.62 | 10.53 | 11.26 | 10.68 | 10.05 |
| STK17A  | 13.15 | 11.88 | 10.92 | 13.08 | 12.84 |
| STK17B  | 11.26 | 12.69 | 12.01 | 12.31 | 11.22 |
| STK19   | 11.54 | 12.21 | 11.05 | 12.08 | 10.92 |
| STK24   | 14.75 | 12.98 | 13.26 | 12.64 | 12.01 |

|        |       |       |       |       |       |
|--------|-------|-------|-------|-------|-------|
| STK25  | 12.59 | 13.39 | 13.73 | 14.43 | 12.76 |
| STK36  | 9.88  | 10.72 | 11.29 | 11.05 | 9.18  |
| STK38  | 13.2  | 12.68 | 12.41 | 13.43 | 12.25 |
| STK38L | 10.62 | 10.11 | 9.44  | 8.78  | 12.6  |
| STK39  | 11.28 | 11.63 | 11.12 | 12.34 | 12.09 |
| STK4   | 10.8  | 11.75 | 11.02 | 11.52 | 10.32 |
| STK40  | 10.91 | 12.87 | 11.56 | 11.38 | 11.93 |
| STRADA | 10.57 | 10.42 | 10.74 | 10.81 | 10.74 |
| STRADB | 11.95 | 12.84 | 11.31 | 12.42 | 11.35 |
| TAOK1  | 12.2  | 12.13 | 11.81 | 12.54 | 12.23 |
| TAOK2  | 10.61 | 9.67  | 10.63 | 10.3  | 11.16 |
| TAOK3  | 11.77 | 9.9   | 11.17 | 10.12 | 11.38 |
| TBK1   | 12.23 | 11.44 | 12.55 | 12.43 | 11.95 |
| TESK1  | 11.22 | 10.92 | 10.98 | 11.32 | 10.85 |
| TGFBR1 | 14.18 | 11.49 | 12.93 | 14.79 | 14.91 |
| TGFBR2 | 11.82 | 12.34 | 11.36 | 10.71 | 11.03 |
| TLK1   | 10.47 | 11.14 | 10.97 | 11.6  | 11.16 |
| TRIB3  | 10.63 | 13.44 | 11.44 | 7.35  | 12.92 |
| TRIM28 | 14.28 | 14.86 | 15.25 | 14.18 | 13.53 |
| TRIO   | 11.65 | 11.78 | 10.19 | 12.25 | 11.83 |
| TRPM7  | 11    | 10.17 | 11.53 | 10.91 | 11.08 |
| TTBK2  | 10.44 | 10    | 10.45 | 10.4  | 10.7  |
| TWF1   | 13.11 | 12.19 | 12.73 | 13.21 | 13.3  |
| TYK2   | 11.35 | 12.14 | 11.76 | 11.74 | 11.96 |
| TYRO3  | 10.7  | 9.34  | 9.92  | 10.39 | 10.37 |
| UHMK1  | 14.01 | 13.83 | 13.21 | 14.16 | 13.6  |
| ULK1   | 9.82  | 9.61  | 10.28 | 10.15 | 10.54 |
| ULK3   | 12.27 | 11.16 | 12.92 | 11.61 | 12.69 |
| VRK1   | 11.94 | 10.58 | 11.25 | 11.12 | 11.1  |
| VRK2   | 11.9  | 12.34 | 11.57 | 11.45 | 11.87 |
| WEE1   | 12.22 | 12.89 | 12.73 | 11.31 | 11.26 |
| WNK1   | 14.26 | 11.66 | 11.07 | 11.18 | 13.42 |
| YES1   | 12.81 | 13.88 | 12.74 | 12.75 | 12.45 |
| ZAK    | 10.47 | 12    | 11.71 | 12.61 | 13.36 |
| ACVR1B | 8.56  | 8.18  | 8.4   | 8.8   | 9.07  |
| ACVR1C | 4.69  | 9.37  | 4.87  | 8.81  | 6.88  |
| ACVR2B | 8.9   | 9.58  | 8.9   | 8.35  | 7.79  |
| ACVRL1 | 6.1   | 4.38  | 2.65  | 6.13  | 5.57  |
| ADCK1  | 7.81  | 6.61  | 6.95  | 7.12  | 7.96  |
| ADCK5  | 9.61  | 9.13  | 9.21  | 9.3   | 8.9   |
| ADRBK2 | 5.69  | 7.73  | 7.16  | 8.2   | 10.24 |

|          |       |       |       |       |       |
|----------|-------|-------|-------|-------|-------|
| ALPK1    | 7.68  | 7.57  | 8.54  | 8.55  | 9.08  |
| BCR      | 11.01 | 10.68 | 10.47 | 10.36 | 10.96 |
| BMPR1A   | 11.16 | 10.59 | 10.31 | 9.92  | 10.77 |
| BRAF     | 9.78  | 10.51 | 10.44 | 9.42  | 10.71 |
| BRSK1    | 6.13  | 9.84  | 8.43  | 9.23  | 8.68  |
| CAMK1D   | 6.04  | 10.55 | 11.2  | 8.55  | 10.34 |
| CAMK2B   | 5.1   | 6.97  | 8.87  | 8.88  | 5.47  |
| CAMK2G   | 9.44  | 9.06  | 8.43  | 9.53  | 10.54 |
| CAMKK1   | 8.8   | 7.27  | 7.9   | 8.99  | 7.75  |
| CASK     | 10.42 | 10.86 | 9.33  | 10.22 | 10.35 |
| CDC7     | 8.67  | 8.72  | 10.2  | 10.11 | 9.09  |
| CDK10    | 9.59  | 8.67  | 9.87  | 11.09 | 9.69  |
| CDK15    | 8.73  | 3.85  | 2.65  | 7.72  | 7.78  |
| CDK20    | 9.89  | 9.07  | 9.91  | 11.02 | 9.34  |
| CDK8     | 9.69  | 9.57  | 9.4   | 10.23 | 9.8   |
| CDKL1    | 9.32  | 8.22  | 7.24  | 8.92  | 9.31  |
| CDKL3    | 6.52  | 7.18  | 7.84  | 7.33  | 7.83  |
| CDKL4    | 6.94  | 4.43  | 4.94  | 4.61  | 4.5   |
| CHEK1    | 11    | 10.26 | 10.1  | 9.73  | 10.22 |
| CIT      | 8.95  | 7.99  | 9.6   | 8.8   | 8.86  |
| CLK4     | 9.64  | 10.59 | 10.48 | 9.81  | 9.59  |
| CSNK1A1L | 7.56  | 7.08  | 8.32  | 7.79  | 7.11  |
| CSNK1G1  | 9.86  | 8.68  | 8.83  | 9.84  | 9.94  |
| DAPK1    | 5.81  | 8.78  | 4.58  | 10.98 | 7.13  |
| DAPK2    | 9.25  | 7.25  | 4.64  | 7.51  | 7.92  |
| DMPK     | 9.4   | 8.43  | 9.97  | 9.17  | 9.52  |
| DSTYK    | 10.03 | 10.33 | 9.51  | 9.98  | 9.7   |
| EEF2K    | 10.12 | 9.83  | 10.15 | 9.38  | 9.48  |
| EIF2AK3  | 9.98  | 11.01 | 10.13 | 10.15 | 10.24 |
| EPHA2    | 8.97  | 9.95  | 7.8   | 9.52  | 9.87  |
| ERBB2    | 9.07  | 8.38  | 8.7   | 8.46  | 8.74  |
| ERN1     | 8.47  | 10.36 | 7.97  | 7.8   | 9.57  |
| FGFR2    | 9.21  | 6.11  | 9.96  | 6.85  | 10.87 |
| FRK      | 7.23  | 7.02  | 5.01  | 8.44  | 5.86  |
| FYN      | 5.83  | 11.23 | 7.75  | 10.29 | 9.98  |
| GRK5     | 9.67  | 10.64 | 8.63  | 9.56  | 9.27  |
| GSG2     | 7.91  | 7.05  | 6.66  | 8.19  | 6.24  |
| ICK      | 10    | 9.09  | 9.73  | 9.59  | 9.88  |
| IKBKE    | 9.66  | 7.49  | 8.33  | 10.12 | 9.4   |
| ILK      | 8.35  | 8.33  | 7.6   | 7.4   | 6.58  |
| INSR     | 9.33  | 9.93  | 8.33  | 6.73  | 8.66  |

|         |       |       |       |       |       |
|---------|-------|-------|-------|-------|-------|
| IRAK2   | 8.46  | 8.31  | 7.03  | 9.63  | 7.6   |
| LATS1   | 10.12 | 10.49 | 9.47  | 10.1  | 10.05 |
| LMTK2   | 9.11  | 9.65  | 9.5   | 9.57  | 10.11 |
| LTK     | 6.38  | 9.34  | 6.16  | 3.55  | 6.06  |
| MAK     | 6.07  | 8.23  | 6.53  | 9.1   | 4.36  |
| MAP2K6  | 6.38  | 7.02  | 9.63  | 11.46 | 6.22  |
| MAP2K7  | 8.82  | 8.82  | 8.6   | 8.47  | 8.53  |
| MAP3K1  | 8.32  | 8.37  | 7.85  | 8.35  | 10.28 |
| MAP3K11 | 7.65  | 7.94  | 8.55  | 8.13  | 7.74  |
| MAP3K12 | 8.41  | 6.83  | 10.84 | 8.39  | 10.76 |
| MAP3K13 | 6.65  | 8.55  | 7.89  | 9.63  | 8.56  |
| MAP3K14 | 8.79  | 9.1   | 8.16  | 10.61 | 8.79  |
| MAP3K5  | 11.48 | 9.12  | 4.11  | 7.88  | 7.48  |
| MAP3K8  | 8.03  | 6.2   | 6.64  | 8.93  | 6.28  |
| MAP3K9  | 8.01  | 7.7   | 6.74  | 7.92  | 7.26  |
| MAP4K3  | 10.4  | 10.9  | 10.28 | 10.12 | 10.7  |
| MAPK13  | 6.44  | 6.04  | 5.1   | 4.89  | 5.87  |
| MAPK8   | 8.3   | 8.48  | 7.94  | 6.77  | 9.05  |
| MARK1   | 8.67  | 9.16  | 9.55  | 10.54 | 9.07  |
| MAST2   | 9.48  | 10.72 | 9.23  | 10.15 | 9.05  |
| MAST4   | 9.24  | 8.52  | 10.63 | 8.08  | 9.59  |
| MASTL   | 10.33 | 9.13  | 9.43  | 9.63  | 9.23  |
| MOK     | 10.46 | 10.42 | 7.75  | 9.24  | 9.16  |
| MYLK2   | 5.39  | 4.81  | 4.65  | 5.49  | 6.36  |
| NEK1    | 9.68  | 9.61  | 9.46  | 9.71  | 9.56  |
| NEK3    | 9.51  | 8.96  | 9.18  | 9.2   | 9.87  |
| NEK4    | 10.27 | 9.34  | 10.41 | 9.88  | 9.02  |
| NEK8    | 8.05  | 7.28  | 7.19  | 7.24  | 8.07  |
| NUAK2   | 7.25  | 10.81 | 7.16  | 8.71  | 9.52  |
| PAK1    | 10.85 | 9.9   | 9.77  | 10.34 | 10.84 |
| PAN3    | 9.1   | 9.16  | 10.18 | 8.75  | 8.87  |
| PASK    | 7.44  | 6.36  | 8.34  | 7.85  | 6.31  |
| PDGFRB  | 7.89  | 9.11  | 8.06  | 5.83  | 10.45 |
| PDK4    | 8.2   | 12.45 | 9.14  | 8.53  | 8.1   |
| PKMYT1  | 9.52  | 7.63  | 9.02  | 9.11  | 8.39  |
| PKN3    | 10.09 | 8.36  | 9.71  | 7.73  | 7.4   |
| PLK3    | 9.26  | 10    | 8.21  | 8.88  | 10.55 |
| PLK4    | 9.47  | 9.76  | 10.09 | 9.88  | 9.33  |
| PRKCA   | 7.74  | 6.7   | 7.12  | 9.17  | 9.49  |
| PRKCE   | 8.56  | 8.67  | 8.84  | 7.92  | 8.91  |
| PRKD2   | 9.68  | 10.78 | 10.21 | 9.8   | 9.14  |

|         |       |       |       |       |       |
|---------|-------|-------|-------|-------|-------|
| PRKDC   | 9.98  | 10    | 9.76  | 9.21  | 9.84  |
| PRKX    | 8.77  | 10.85 | 8.86  | 12.16 | 4.46  |
| PRPF4B  | 8.03  | 7.52  | 7.69  | 7.81  | 6.33  |
| PSKH1   | 9.84  | 8.53  | 9.75  | 8.73  | 10.07 |
| PTK7    | 8.24  | 8.73  | 8.6   | 5.72  | 8.27  |
| RIPK1   | 10.26 | 10.01 | 10.31 | 9.88  | 8.88  |
| RIPK4   | 10.38 | 9.87  | 11.22 | 8.58  | 9.62  |
| RNASEL  | 9.1   | 8.32  | 9.25  | 9.48  | 9.12  |
| ROR1    | 7.54  | 6.02  | 3.5   | 7.22  | 0.59  |
| RPS6KA2 | 11.32 | 15.26 | 7.18  | 7.76  | 7.23  |
| RPS6KA4 | 7.94  | 6.7   | 7.59  | 8.05  | 7.77  |
| RPS6KA5 | 7.81  | 9.14  | 6.97  | 6.06  | 7.1   |
| RPS6KL1 | 8.77  | 5.21  | 6.65  | 9.05  | 7.35  |
| SCYL3   | 8.69  | 9.05  | 8.5   | 8.7   | 8.39  |
| SIK1    | 7.57  | 7.75  | 6.39  | 8.75  | 7.52  |
| SIK2    | 11.15 | 10.59 | 10.59 | 10.1  | 10.66 |
| SNRK    | 9.41  | 8.88  | 9.5   | 8.83  | 8.32  |
| STK11   | 9.71  | 10.07 | 10.27 | 9.77  | 9.99  |
| STK3    | 10.35 | 11.08 | 9.83  | 10.4  | 10.2  |
| STK32B  | 6.65  | 8.6   | 10.12 | 5.96  | 7.57  |
| STK32C  | 8.67  | 7.23  | 7.83  | 7.87  | 7     |
| STK33   | 10.33 | 9.63  | 10.11 | 0.7   | 8.59  |
| STK35   | 9.22  | 9.59  | 9.77  | 9.61  | 8.32  |
| STYK1   | 5.16  | 6.57  | 8.18  | 6.75  | 11.16 |
| TAF1    | 9.52  | 9.89  | 9.7   | 9.72  | 9.6   |
| TBCK    | 9.52  | 11    | 10.68 | 9.28  | 10.06 |
| TEC     | 6.78  | 8.61  | 8.87  | 9.45  | 6.75  |
| TEK     | 5.04  | 9.61  | 7.29  | 5.77  | 7.08  |
| TESK2   | 8.06  | 10.58 | 8.65  | 4.67  | 7.25  |
| TEX14   | 6.35  | 10.17 | 9.22  | 6.04  | 8.37  |
| TNK2    | 7.59  | 6.06  | 8.61  | 7.25  | 7.31  |
| TP53RK  | 9.67  | 8.42  | 10.08 | 10.37 | 9.68  |
| TRIB1   | 9.46  | 10.03 | 10.13 | 9.76  | 11.07 |
| TRIM24  | 10.43 | 10.2  | 9.59  | 8.92  | 10.77 |
| TSSK1B  | 6.49  | 6.47  | 3.2   | 4.67  | 5.37  |
| TSSK6   | 7.01  | 7.38  | 7.35  | 6.38  | 6.85  |
| TTK     | 10.49 | 10.34 | 8.96  | 9.9   | 9.13  |
| TTN     | 10.45 | 11.75 | 8.08  | 9.82  | 7.73  |
| ULK2    | 10.83 | 10.59 | 10.17 | 9.89  | 9.35  |
| ULK4    | 10.62 | 7.46  | 6.54  | 7.86  | 7.42  |
| VRK3    | 10.15 | 10.48 | 10.05 | 9.32  | 10.23 |



|          |      |      |      |      |      |
|----------|------|------|------|------|------|
| WNK4     | 9.37 | 10.4 | 4.4  | 7.54 | 5.89 |
| AAK1     | 2.75 | 3.5  | 2.44 | 3.47 | 1.97 |
| AATK     | 1    | 5.05 | 5.92 | 3.07 | 3.92 |
| ALK      | 0    | 1.78 | 0.96 | 0    | 1.98 |
| ALPK3    | 4.65 | 3.8  | 4.85 | 3.48 | 6.58 |
| AMHR2    | 1    | 5.51 | 4.26 | 5.13 | 1.01 |
| ANKK1    | 0    | 4.45 | 4.94 | 3.94 | 2.68 |
| AURKC    | 5.45 | 7.85 | 6.91 | 5.33 | 7.02 |
| BLK      | 1.15 | 0.95 | 0    | 1.44 | 1.77 |
| BMPR1B   | 0    | 1.57 | 3.36 | 4.22 | 4.7  |
| BMX      | 0    | 1.94 | 0.61 | 0    | 1.53 |
| BRSK2    | 3.26 | 6.68 | 6.24 | 5.15 | 3.07 |
| BTK      | 1.44 | 4.45 | 2.77 | 0.93 | 1.53 |
| C9orf96  | 2.44 | 2.66 | 3.47 | 3.24 | 2.54 |
| CAMK1G   | 1    | 1.98 | 0.56 | 1.17 | 0    |
| CAMK2A   | 3.61 | 5.15 | 5.87 | 4.16 | 6.81 |
| CAMK4    | 2.85 | 0.6  | 6.76 | 7.42 | 7.18 |
| CAMKV    | 5.33 | 5.53 | 3.03 | 0.93 | 1.58 |
| CDC42BPG | 1.96 | 2.53 | 5.07 | 1.06 | 3.83 |
| CDKL2    | 5.43 | 5.55 | 7.43 | 0    | 5.33 |
| CDKL5    | 2.63 | 6.42 | 5.7  | 2.03 | 1.57 |
| CSF1R    | 2.62 | 2.29 | 1.53 | 2.93 | 6.26 |
| DCLK1    | 1.32 | 5.13 | 7.43 | 5.49 | 4.96 |
| DCLK3    | 0    | 0    | 0    | 0.7  | 0.56 |
| EPHA1    | 1.21 | 2.14 | 1.3  | 0.54 | 6.22 |
| EPHA3    | 1.89 | 1.8  | 0.61 | 5.21 | 6.32 |
| EPHA5    | 0    | 3.24 | 5.69 | 3.85 | 0    |
| EPHA6    | 0    | 3.29 | 0    | 2.23 | 0.56 |
| EPHA7    | 0    | 4.81 | 5.39 | 1.06 | 0    |
| EPHB1    | 1.86 | 7.56 | 6.6  | 4.14 | 6.4  |
| EPHB2    | 1.21 | 5.84 | 2.19 | 8.04 | 7.01 |
| EPHB3    | 0.93 | 2.42 | 7.06 | 3.9  | 5.39 |
| EPHB6    | 2.46 | 1.94 | 7.15 | 7.15 | 7.98 |
| ERBB3    | 7.58 | 6.74 | 6.23 | 5.8  | 4.54 |
| ERBB4    | 0    | 4.37 | 2.15 | 5.02 | 1.57 |
| ERN2     | 2.85 | 2.13 | 1.03 | 0.7  | 0    |
| FES      | 7.09 | 2.79 | 1.36 | 0    | 6.32 |
| FGFR3    | 1    | 7.51 | 10.3 | 5.46 | 6.02 |
| FGFR4    | 2.38 | 9.34 | 4.5  | 4.69 | 7.67 |
| FGR      | 1.64 | 5.67 | 3.67 | 2.72 | 2.15 |
| FLT3     | 0    | 0.55 | 0.56 | 0.54 | 0.59 |

|         |      |      |       |      |      |
|---------|------|------|-------|------|------|
| FLT4    | 0    | 0.99 | 6.87  | 2.46 | 0.56 |
| GRK1    | 1.32 | 2    | 3.6   | 0.93 | 2.28 |
| GRK4    | 5.01 | 2.42 | 3.96  | 5.46 | 4.44 |
| GRK7    | 0    | 1.35 | 0     | 0    | 0    |
| GUCY2C  | 0    | 0.99 | 0     | 0.54 | 0.59 |
| GUCY2D  | 1    | 2.54 | 0     | 2.28 | 1.27 |
| GUCY2F  | 0    | 0    | 0     | 0    | 0    |
| HCK     | 1    | 5.15 | 0     | 2.09 | 8.25 |
| HIPK4   | 5.6  | 4.52 | 4.07  | 2.71 | 5.34 |
| IKBKB   | 4.97 | 3.62 | 4.19  | 5.2  | 3.57 |
| INSRR   | 0    | 0.95 | 2.34  | 3.29 | 1.01 |
| IRAK3   | 0.49 | 4.66 | 0     | 3.8  | 3.73 |
| JAK3    | 3.23 | 7.89 | 9.35  | 0.54 | 8.54 |
| KALRN   | 2.6  | 5.72 | 5.74  | 7.18 | 3.74 |
| KDR     | 0.58 | 5.7  | 12.57 | 11.1 | 7.69 |
| KIT     | 0    | 4.32 | 2.14  | 6.53 | 5.28 |
| KSR1    | 3.65 | 3.43 | 2.98  | 4.12 | 1.78 |
| KSR2    | 0.58 | 2.46 | 0     | 2.14 | 1.27 |
| LCK     | 0.86 | 3.2  | 1.6   | 0    | 0    |
| LMTK3   | 0.93 | 5.69 | 4.82  | 0    | 4.37 |
| LRRK1   | 0    | 7.23 | 4.14  | 6.15 | 0    |
| LRRK2   | 6.08 | 4.17 | 9.68  | 5.38 | 4.83 |
| MAP3K15 | 2.12 | 6.1  | 5.54  | 6.59 | 5.03 |
| MAP4K1  | 4.39 | 6.21 | 7.12  | 5.06 | 7.02 |
| MAPK10  | 1.58 | 6.31 | 7.74  | 6.16 | 6.97 |
| MAPK15  | 1.76 | 4.34 | 6.1   | 3.7  | 3.37 |
| MAPK4   | 0    | 1.59 | 0.96  | 2.6  | 3.07 |
| MARK2   | 6.6  | 6.39 | 6.62  | 5.8  | 6.08 |
| MARK4   | 6.3  | 7.05 | 7.88  | 6.34 | 6.48 |
| MAST1   | 4.85 | 4.45 | 5.46  | 5.49 | 5.03 |
| MATK    | 1.26 | 1.8  | 0     | 2.37 | 0.99 |
| MERTK   | 4.77 | 7.32 | 8.35  | 7.03 | 6.62 |
| MOS     | 0    | 4.57 | 0.56  | 0    | 0.96 |
| MUSK    | 0    | 2.9  | 0.96  | 0    | 0    |
| MYLK3   | 1.26 | 3.83 | 3.13  | 1.58 | 1.95 |
| MYLK4   | 5.64 | 3.62 | 6.22  | 4.71 | 4.44 |
| MYO3A   | 0    | 0.55 | 6.11  | 0.54 | 1.99 |
| MYO3B   | 0    | 0    | 0.99  | 2.89 | 0.96 |
| NEK10   | 2.95 | 6.25 | 5.97  | 6.52 | 4.25 |
| NEK11   | 4.11 | 5.28 | 8.38  | 7.92 | 7.78 |
| NEK5    | 0    | 2.16 | 0.61  | 1.24 | 2.54 |

|         |      |      |      |       |       |
|---------|------|------|------|-------|-------|
| NIM1    | 0    | 0    | 3.67 | 6.19  | 4.27  |
| NPR1    | 8.39 | 1.57 | 1.36 | 2.64  | 0.96  |
| NRK     | 0    | 0.55 | 5.68 | 0.93  | 2.15  |
| NTRK1   | 0.93 | 2.96 | 2.59 | 6.37  | 5.03  |
| NTRK2   | 1.21 | 1.02 | 5.95 | 9.29  | 3.13  |
| NTRK3   | 6.45 | 5.58 | 4.77 | 2.05  | 8.27  |
| OBSCN   | 3.19 | 4.68 | 5.27 | 5.85  | 4.24  |
| PAK3    | 0    | 0    | 1.36 | 6.31  | 3.95  |
| PAK6    | 9.53 | 2.59 | 7.73 | 2.09  | 8.73  |
| PAK7    | 0    | 2.36 | 0.61 | 4.25  | 0.56  |
| PDGFRA  | 1.82 | 1.35 | 1.99 | 1.06  | 3.56  |
| PHKG1   | 3.94 | 4.36 | 7.3  | 4.17  | 5.54  |
| PKDCC   | 0    | 3.38 | 4.66 | 5.69  | 6.35  |
| PLK5    | 0    | 0    | 2.47 | 1.81  | 0.59  |
| PNCK    | 2.71 | 4.21 | 5.25 | 4.18  | 7.28  |
| PRKAA2  | 3.51 | 2.88 | 7.94 | 10.68 | 5.44  |
| PRKACG  | 0    | 4.07 | 2.19 | 0     | 0.99  |
| PRKCB   | 0    | 0    | 1.03 | 6.79  | 1.99  |
| PRKCG   | 0    | 2.33 | 2.56 | 2.03  | 2.3   |
| PRKCH   | 6.33 | 6.25 | 5.81 | 7.24  | 8.78  |
| PRKCQ   | 5.79 | 1.57 | 2.8  | 0     | 1.58  |
| PRKD1   | 3.74 | 6.11 | 9.03 | 6.37  | 9.6   |
| PRKG1   | 2.89 | 2.85 | 5.47 | 4.89  | 10.48 |
| PRKG2   | 2.1  | 9.3  | 5.55 | 7.57  | 8.9   |
| PSKH2   | 0    | 1.78 | 3.57 | 0     | 1.34  |
| PTK6    | 3.92 | 1.02 | 5.85 | 4.2   | 4.02  |
| RET     | 2.34 | 3.51 | 1.81 | 2.09  | 0.59  |
| RIPK3   | 4.7  | 4.92 | 6.46 | 0     | 8.15  |
| ROR2    | 1.49 | 8.26 | 8.63 | 9.15  | 4.43  |
| ROS1    | 1.89 | 0    | 0    | 4.24  | 9.04  |
| RPS6KA6 | 0    | 2.75 | 7.51 | 5.48  | 9.23  |
| SBK1    | 1.86 | 3.78 | 3.75 | 2.03  | 2.79  |
| SBK2    | 0.86 | 3.17 | 2.36 | 0     | 0     |
| SGK2    | 4.04 | 6.73 | 6.93 | 3.96  | 4.67  |
| SGK494  | 6.68 | 6.9  | 7.93 | 7.01  | 5.86  |
| SRMS    | 0.86 | 0    | 0    | 0     | 0     |
| SRPK3   | 0.49 | 3.14 | 5.67 | 2.84  | 6.85  |
| STK31   | 1.26 | 3.49 | 2.86 | 3.71  | 1.32  |
| STK32A  | 0    | 0.6  | 2.3  | 2.18  | 1.99  |
| SYK     | 0    | 0    | 8.36 | 7.17  | 0.59  |
| TIE1    | 0    | 4.1  | 0    | 0.7   | 0     |

|       |      |      |      |       |      |
|-------|------|------|------|-------|------|
| TNK1  | 5.18 | 3.92 | 4.13 | 2.5   | 2.3  |
| TRPM6 | 0    | 3.21 | 1.99 | 3.73  | 1.81 |
| TSSK3 | 0.58 | 5.18 | 4.21 | 2.78  | 2.43 |
| TSSK4 | 0    | 0    | 0    | 0     | 0    |
| TTBK1 | 0    | 0    | 1.03 | 0     | 1.01 |
| TXK   | 1.6  | 2.69 | 6.16 | 7.63  | 2.99 |
| WEE2  | 0    | 0.6  | 2.46 | 0.7   | 1.32 |
| WNK2  | 0.93 | 8.09 | 7.84 | 10.32 | 5.84 |
| WNK3  | 0    | 4.23 | 3.37 | 8.64  | 6.95 |
| ZAP70 | 3.58 | 4.29 | 3.43 | 4.1   | 4.34 |

**Supplementary Table 2: RT-qPCR Primer sequences**

| target gene symbol | FW primer sequence               | REV primer sequence              |
|--------------------|----------------------------------|----------------------------------|
| ULK4               | 5'-GCTCATTACTGACATCCAAGG-3'      | 5'-AGGCTCTCCAAGTGCTTCTC-3'       |
| NPR1               | 5'-AAGCCCTGAAGATCCACTTG-3'       | 5'-GTCCGAACCTTGCCTTTG-3'         |
| CDKL4              | 5'-AGATGTTTCATCCTGTGGCTCT-3'     | 5'-AAAGTAGGAGCTCTCCAGGAGTT-3'    |
| WNK2               | 5'-ACCCAGAAGCTGCAAGACAT-3'       | 5'-GTGGCATCCCCACTCCT-3'          |
| KDR                | 5'-GAACCAGAAGTAAAAGTAATCCCAGA-3' | 5'-AGATAATTTGGTTCTGTCTTCCAAAG-3' |
| FGFR3              | 5'-TTTGACCGAGTCTACACTCACC-3'     | 5'-AGGGATGCCGGGGTA-3'            |
